# Supplementary material for: MiRenSVM: towards better prediction of microRNA precursors using an ensemble SVM classifier with multi-loop features
Source: PubMed Central journal article supplement (PMC3024864; doi:10.1186/1471-2105-11-s11-s11), 2010-12-14
Supplement: 1471-2105-11-S11-S11-S1.pdf [file 1471-2105-11-S11-S11-S1.pdf]

## **Supplementary**

### **MiRenSVM: Towards Better Prediction of MicroRNA Precursors**

#### **Using an Ensemble SVM Classifier with Multi-loop Features**

Jiandong Ding<sup>1</sup>, Shuigeng Zhou<sup>1§</sup> and Jihong Guan<sup>2§</sup>

<sup>1</sup>Shanghai Key Lab of Intelligent Information Processing, and School of Computer Science, Fudan University, Shanghai 200433, China.

<sup>2</sup>Department of Computer Science and Technology, Tongji University, Shanghai 201804, China.

<sup>§</sup>Corresponding author

Email addresses:

Jiandong Ding: [jdding@fudan.edu.cn](mailto:jdding@fudan.edu.cn)

Shuigeng Zhou: [sgzhou@fudan.edu.cn](mailto:sgzhou@fudan.edu.cn)

Jihong Guan: [jhguan@tongji.edu.cn](mailto:jhguan@tongji.edu.cn)

**Table S1:** Homo sapiens pre-miRNAs with multi-loops secondary structure [1]:

| <b>Database</b> | <b>Num_loops</b> | <b>Num_total</b> | <b>Proportion(%)</b> |
|-----------------|------------------|------------------|----------------------|
| miRBase 5.0     | 14               | 207              | 6.76                 |
| miRBase 8.2     | 36               | 462              | 7.79                 |
| miRBase 13.0    | 34               | 715              | 4.76                 |
| <b>Total:</b>   | <b>84</b>        | <b>1384</b>      | <b>6.07</b>          |

\*Num\_loops: number of *hsa* pre-miRNA with multi-loop secondary structure

\*Num\_total: number of *hsa* pre-miRNA in the database

**Table S2:** Homo sapiens pre-miRNAs in miRBase13.0 [2] whose MFE is higher than -16kal/mol (predicted by RNAfold [3] under the default parameters)

|                                                                                           |
|-------------------------------------------------------------------------------------------|
| >hsa-mir-1973 MI0009983                                                                   |
| UAUGUUAACACGGCCAUGGUAUCCUGACCGUGCAAAGGUAGCAUA                                             |
| (((((.....(((.....)))))).....)))) (-10.80)                                                |
| >hsa-mir-1978 MI0009988                                                                   |
| UAGACGGGCUCACAUCACCCCAUAAACAAGUUUGGUCCUAGCCUUUCUA                                         |
| (((((.....(((.....)))))).....)))) (-13.70)                                                |
| >hsa-mir-2052 MI0010486                                                                   |
| CUGUUUUGAUAAACAGUAAUGUCCUUUAGUUCAAAGUUAACCAGCUAUCAAAACAA                                  |
| .(((((((.....)))))).....)) (-10.69)                                                       |
| >hsa-mir-2054 MI0010488                                                                   |
| CUGUAAUUAUUUUUUUUUUUUCUCUAUCAUUAAAAAUGUAUUACAG                                            |
| (((((.....(((.....)))))).....)))) (-8.20)                                                 |
| >hsa-mir-198 MI0000240                                                                    |
| UCAUUGGUCCAGAGGGGAGAUAGGUUCCUGUGAUUUUUCCUUCUCUAUAGAAUAAAUGA                               |
| (((((.....(((.....)))))).....)))) (-15.44)                                                |
| >hsa-mir-384 MI0001145                                                                    |
| UGUUAUAAUCAGGAAUUUUAACAUAUCCUAGACAUAUUGUAUAAUGUUAUAGUCAUAGUCAUCCUAGAAUUGUUAUAAUGCCUGUAACA |
| .(((((((.....)))))).....)) (-15.00)                                                       |
| >hsa-mir-923 MI0005715                                                                    |
| UAUUUGUCAGCGGAGGAAAAGAAACUAACCAGGAUCCUCAGUAAUGGCAGUG                                      |
| (((((.....(((.....)))))).....)))) (-13.00)                                                |
| >hsa-mir-924 MI0005716                                                                    |
| AAUAGAGUCUUGUGAUGUCUUGCUUAAGGGCCAACCUAGAGUCUACAAC                                         |
| ..(((((((.....)))))).....)) (-12.30)                                                      |
| >hsa-mir-1279 MI0006426                                                                   |
| AUAUUCACAAAAUUCUAUUGUCUUCUUAUUGCCAGAAAGAAGAGUAUAGAACUUC                                   |
| .....(((((((.....)))))).....)) (-12.10)                                                   |
| >hsa-mir-1308 MI0006441                                                                   |
| CCCCGCAUGGGUGGUUCAGUGGCAGAAUUCUCAAUUGUAUCCCAUAAUCCC                                       |
| .....(((((((.....)))))).....)) (-12.60)                                                   |
| >hsa-mir-1321 MI0006652                                                                   |
| ACAUUAUGAAGCAAGUAUUUUUUAUCCUGUUUUACAUAUAGGAAUAAACUCAGGGAGGUGAAUGUGAUCAAAGAUAG             |
| .....(((((((.....)))))).....)) (-11.60)                                                   |
| >hsa-mir-1322 MI0006653                                                                   |
| AGUAUCAUGAAUUAGAAACCUACUUUUACAUAUAGUUUACAUAAGAAGCGUGAUGAUGCUGCUGAUGCUGUA                  |
| (((((.....(((.....)))))).....)))) (-11.30)                                                |

**Table S3:** Sequences of 14 *hsa* and 13 *aga* pre-miRNA whose identity is lower than 90% (predicted by CD-HIT [4])

|                                                                                                                       |
|-----------------------------------------------------------------------------------------------------------------------|
| <b>13 <i>aga</i> pre-miRNAs:</b>                                                                                      |
| >aga-mir-137 MI0010601                                                                                                |
| AAAACUUGGUUGGCCACGCGUAUUCUUGGGUUACUAACACACUGUUUAUGUUGUUUAUUGCUUGAGAAUACACGUAUUGACUAGUGUUGUA                           |
| >aga-mir-190 MI0010594                                                                                                |
| UGUUUGGUGGGACAGUUUCGGUGAGAUUGUUUGAUUUCUUGGUUGUUAAGAUUUCAAUUUACCCAGGAAUCAACAUAUUUUACCGUG<br>ACUGUCGU                   |
| >aga-mir-263b MI0010606                                                                                               |
| UGACCAAUAUGGACCUUGGCACUGGGAGAAUUCACAGUGGAUCGUACCAUAUCGUUUUCUGUGGAUCUUUCGUGCCAUCGUUCAGAUUUGGU<br>GCC                   |
| >aga-mir-286 MI0010605                                                                                                |
| GUCAUAAUUUGGGCGAUUUGUCGGACUAGUCGCGUCGAGUCAUUCGGUUUACCCUAGUGACUAGACCGAACACUCGCGUCCUAAACGAAC<br>GAC                     |
| >aga-mir-309 MI0010607                                                                                                |
| AAGAUGCACAAACUCCGUCCAGAGGGUGUCCGAUUUCAAGAACUCAUCUGGGCAAAGUUUGUCGCAUAAA                                                |
| >aga-mir-927 MI0010596                                                                                                |
| UAGUUAUGGUUUUUUAGAAUUCUACGCUUUACCCGUGAUUAAAGUAGUGCGGCAAAGCGUUUGGAUUCUGAAACGAAACGUUACAACG                              |
| >aga-mir-929 MI0010595                                                                                                |
| CCUACGCGUGGGAUUAAAUUGACUCUAGUAGGGAGUCCUUUUUACGAGCGACUCCCUAACGGAGUCAGAUUGAUUCCGGUAGUGCACC                              |
| >aga-mir-957 MI0010600                                                                                                |
| UGAUCACUGCGUGCGUUAGUUUUGGGCGGUUUUAGUGUAUUUCGAUGAGAAUUCUAUUGAAACCGUCCAAAACUGAGGCUGGCAGAUUGGUUA<br>C                    |
| >aga-mir-965-1 MI0010602                                                                                              |
| CGAAGUAAAUCGACGAAUUCUGAAAGGGAAUGCUGUACACUCUAUGUGCUAAAAUAUCCAUAAGCGUAUAGCUUUUCCAUUUAGCGUUCG<br>UUGCGAGCAA              |
| >aga-mir-970 MI0010599                                                                                                |
| AUGGCUGACGGAAGAUAGCCAGCGUUUGUUUUUUUGGUAUGUUACUACUGCUGCAAGCUAUUAUCAUAAGACACACGCGCUUUUUCCGCAA<br>CCCGA                  |
| >aga-mir-988 MI0010598                                                                                                |
| CUGUGGAGCAUUGGACAUUGCCGGUGUGUUUUUGUGACAAUGAGAUUUAAUAGUUUAAGUUAUCCCUUGUUGCAAACCUCACGCUGGCGG<br>UGUUUCCGA               |
| >aga-mir-993 MI0010597                                                                                                |
| UGCUCUCCUGGACCUACCCUGUAGUUCGGGCUUUUGUGGUUGAAUAUUUAUCAUAUAUAUCUCAUAUACGCUUAUCAGAAGCUCGU<br>UUCUAUAGAGGUAUCUCAGGGAGUGAA |
| >aga-mir-1000 MI0010604                                                                                               |
| CCUAGCAGUCGAUGAAUUGUCCUGUCACAGCAGUACUUUUUGCCUAGUUUACUGUUGUUUCGGGACAUUCCAUCGACGCUAGGGUUUUCAU                           |
| <b>14 <i>hsa</i> pre-miRNAs:</b>                                                                                      |
| >hsa-mir-1204 MI0006337                                                                                               |
| ACCUCUGGCGUGUCUCCAUAUUUUGAGAUGAGUUACAUCUUGGAGGUGAGGACGUGCCUCGUGGU                                                     |
| >hsa-mir-1972 MI0009982                                                                                               |
| UAUAGGCAUGUGCCACCACACUUGGCUUAAAUGUGUCAUUUAAAAUUCAGGCCAGGCACAGUGGCUCAUGCCUGUA                                          |

|                                                                                            |
|--------------------------------------------------------------------------------------------|
| >hsa-mir-1973 MI0009983                                                                    |
| UAUGUUAACGGCCAUGGUAUCCUGACCGUGCAAAGGUAGCAUA                                                |
| >hsa-mir-1974 MI0009984                                                                    |
| UGUUCUUGUAGUUGAAAUAACAACGAUGGUUUUUCAUAUCAUUGGUCGUGGUUGUAGUCCGUGCGAGAAUA                    |
| >hsa-mir-1975 MI0009985                                                                    |
| AGUUGGUCGAGUGUUGGGUUUAUUGUUAAGUUGAUUUAAACAUUGUCUCCCCCACAACCGCGCUUGACUAGCU                  |
| >hsa-mir-1976 MI0009986                                                                    |
| GCAGCAAGGAAGGCAGGGGUCCUAAGGUGUGUCCUCCUGCCCUCCUUGCUGU                                       |
| >hsa-mir-1977 MI0009987                                                                    |
| UUGAUUAGGGUGCUUAGCUGUUAAACUAAGUUGUUUGGGUUUAAGUCCAUUGGUCUAGUAAGGGCUUAGCUAAUUA               |
| >hsa-mir-1978 MI0009988                                                                    |
| UAGACGGGCUCACAUACCCCAUAAACAAAUAGGUUUGGUCCUAGCCUUUCUA                                       |
| >hsa-mir-1979 MI0009989                                                                    |
| UCUUUACUCCACUGCUUCACUUGACUAGCCUUUAAAAAAGAAAGGCUUGGUUGAUGAAUGGGUGAGAGAAAAGG                 |
| >hsa-mir-2052 MI0010486                                                                    |
| CUGUUUUGAUAAACAGUAAUGUCCUUUAGUUAAGUUAACAGCUAUCAAAACAA                                      |
| >hsa-mir-2053 MI0010487                                                                    |
| CUUGCCAUGUAAAACAGAUUUAAUUAACAUAUUGCAACCUGUGAAGAUGCAAACUUUAA                                |
| >hsa-mir-2054 MI0010488                                                                    |
| CUGUAAUAAAAUUAAUUUUAUUCUCAUCAUUAAAAAUGUAUUACAG                                             |
| >hsa-mir-2110 MI0010629                                                                    |
| CAGGGUUUGGGAAACGGCCGUGAGUGAGGCGUCGGCUGUUGUUCUACCGCGGUCUUUCCUCCACUCUUG                      |
| >hsa-mir-2113 MI0003939                                                                    |
| UUUUCAAAGCAAUGUGUGACAGGUACAGGGACAAAUCCCGUUAAUAAGUAAGAGGAUUUGUCUUGGCUCUGUCACAUGCCACUUUGAAAA |

**Table S4:** Results of miRenSVM on animal pre-miRNAs published in miRBase13.0.

| Species (Animal)                | Evaluated pre-miRNAs | Correctly Predicted | Accuracy (%) |
|---------------------------------|----------------------|---------------------|--------------|
| <i>Apis mellifera</i>           | 64                   | 60                  | 93.75        |
| <i>Branchiostoma floridae</i>   | 74                   | 62                  | 83.78        |
| <i>Bombyx mori</i>              | 61                   | 58                  | 95.08        |
| <i>Bos taurus</i>               | 359                  | 341                 | 94.99        |
| <i>Capitella sp. I</i>          | 72                   | 59                  | 81.94        |
| <i>Caenorhabditis briggsae</i>  | 98                   | 89                  | 90.82        |
| <i>Caenorhabditis elegans</i>   | 155                  | 148                 | 95.48        |
| <i>Canis familiaris</i>         | 325                  | 317                 | 97.54        |
| <i>Ciona intestinalis</i>       | 25                   | 25                  | 100          |
| <i>Ciona savignyi</i>           | 27                   | 26                  | 96.30        |
| <i>Drosophila melanogaster</i>  | 152                  | 138                 | 90.79        |
| <i>Drosophila pseudoobscura</i> | 73                   | 70                  | 95.89        |
| <i>Danio rerio</i>              | 337                  | 331                 | 98.22        |
| <i>Fugu rubripes</i>            | 133                  | 132                 | 99.25        |
| <i>Gallus gallus</i>            | 471                  | 437                 | 92.78        |
| <i>Lottia gigantea</i>          | 57                   | 46                  | 80.70        |
| <i>Monodelphis domestica</i>    | 119                  | 115                 | 96.64        |
| <i>Macaca mulatta</i>           | 458                  | 417                 | 91.05        |
| <i>Mus musculus</i>             | 568                  | 521                 | 91.73        |
| <i>Nematostella vectensis</i>   | 49                   | 43                  | 87.76        |
| <i>Ornithorhynchus anatinus</i> | 344                  | 307                 | 89.24        |
| <i>Pan troglodytes</i>          | 599                  | 528                 | 88.15        |
| <i>Rattus norvegicus</i>        | 286                  | 271                 | 94.76        |
| <i>Schmidtea mediterranea</i>   | 79                   | 75                  | 94.94        |
| <i>Sus scrofa</i>               | 55                   | 54                  | 98.18        |
| <i>Tribolium castaneum</i>      | 55                   | 53                  | 96.36        |
| <i>Tetraodon nigroviridis</i>   | 143                  | 140                 | 97.90        |
| <b>Total</b>                    | <b>5238</b>          | <b>4863</b>         | <b>92.84</b> |

## Features:

### Triplet element (32):

Triplet structure-sequence element is proposed by Xue *et.al* [5]. The detail of these features has already been well described in the main article.

### Base pair feature (15):

11 of these features have been used in previous miRNA gene predicting methods [6, 7]

Four new features relevant to loop number in the predicted secondary structure are introduced:

- $dP/n\_loops$ , where  $n\_loops$  is the number of loops in secondary structure.
- $\%(A-U)/n\_loops$ ,  $\%(G-C)/n\_loops$ ,  $\%(G-U)/n\_loops$ , where  $\%(X-Y)$  is the ratio of X-Y base pairs in the secondary structure.

### Thermodynamics features (18):

6 MFE related features; 8 other global thermodynamics features and 4 statistically significant features are chosen from previous research [6, 7, 8].

The definitions of other features already used by existing pre-miRNA classification methods are available in [7]'s supplementary data.

## References:

1. Jiang P, Wu H, Wang W, et al.: **MiPred: classification of real and pseudo microRNA precursors using random forest prediction model with combined features.** *Nucleic acids research* 2007, **35**:W339-44.
2. Griffiths-Jones S, Saini HK, van Dongen S, Enright AJ: **miRBase: tools for microRNA genomics.** *Nucleic acids research* 2008, **36**:D154-8.
3. Hofacker IL: **Vienna RNA secondary structure server.** *Nucleic acids research* 2003, **31**:3429-31.
4. Li W, Godzik A: **Cd-hit: a fast program for clustering and comparing large sets of protein or nucleotide sequences.** *Bioinformatics* 2006, **22**:1658-9.
5. Xue C, Li F, He T, et al.: **Classification of real and pseudo microRNA precursors using local structure-sequence features and support vector machine.** *BMC bioinformatics* 2005, **6**:310.
6. Ng KL, Mishra SK: **De novo SVM classification of precursor microRNAs from genomic pseudo hairpins using global and intrinsic folding measures.** *Bioinformatics* 2007, **23**:1321-30.
7. Batuwita R, Palade V: **microPred: effective classification of pre-miRNAs for human miRNA gene prediction.** *Bioinformatics* 2009, **25**:989-95.
8. Freyhult E, Gardner PP, Moulton V: **A comparison of RNA folding measures.** *BMC bioinformatics* 2005, **6**:241.
